# Supplementary material for: Avian Cytochrome P450 (CYP) 1-3 Family Genes: Isoforms, Evolutionary Relationships, and mRNA Expression in Chicken Liver
Source: PLoS One. 2013 Sep 30;8(9):e75689. doi: 10.1371/journal.pone.0075689 (PMC3786927; doi:10.1371/journal.pone.0075689)
Supplement: Table S5 — CYP 1-3 genes of human. (XLSX) [file pone.0075689.s007.xlsx]

## Sheet: human
Definition in Genbank	Accession number	Isoform
Homo_sapiens_cytochrome_P450_family_1_subfamily_A_polypeptide_1_(CYP1A1)_mRNA	NM_000499	1A1
Homo_sapiens_cytochrome_P450_family_1_subfamily_A_polypeptide_2_(CYP1A2)_mRNA	NM_000761	1A2
Homo_sapiens_cytochrome_P450_family_1_subfamily_B_polypeptide_1_(CYP1B1)_mRNA	NM_000104	1B1
Homo_sapiens_cytochrome_P450_family_2_subfamily_A_polypeptide_13_(CYP2A13)_mRNA	NM_000766	2A13
Homo_sapiens_cytochrome_P450_family_2_subfamily_A_polypeptide_6_(CYP2A6)_mRNA	NM_000762	2A6
Homo_sapiens_cytochrome_P450_family_2_subfamily_A_polypeptide_7_(CYP2A7)_transcript_variant_1_mRNA	NM_000764	2A7
Homo_sapiens_cytochrome_P450_family_2_subfamily_B_polypeptide_6_(CYP2B6)_mRNA	NM_000767	2B6
Homo_sapiens_cytochrome_P450_family_2_subfamily_C_polypeptide_8_(CYP2C8)_transcript_variant_1_mRNA	NM_000770	2C8
Homo_sapiens_cytochrome_P450_family_2_subfamily_C_polypeptide_9_(CYP2C9)_mRNA	NM_000771	2C9
Homo_sapiens_cytochrome_P450_family_2_subfamily_C_polypeptide_18_(CYP2C18)_transcript_variant_1_mRNA	NM_000772	2C18
Homo_sapiens_cytochrome_P450_family_2_subfamily_C_polypeptide_19_(CYP2C19)_mRNA	NM_000769	2C19
Homo_sapiens_cytochrome_P450_family_2_subfamily_D_polypeptide_6_(CYP2D6)_transcript_variant_1_mRNA	NM_000106	2D6
Homo_sapiens_cytochrome_P450_family_2_subfamily_E_polypeptide_1_(CYP2E1)_mRNA	NM_000773	2E1
Homo_sapiens_cytochrome_P450_family_2_subfamily_F_polypeptide_1_(CYP2F1)_mRNA	NM_000774	2F1
Homo_sapiens_cytochrome_P450_family_2_subfamily_J_polypeptide_2_(CYP2J2)_mRNA	NM_000775	2J2
Homo_sapiens_cytochrome_P450_family_2_subfamily_R_polypeptide_1_(CYP2R1)_mRNA	NM_024514	2R1
Homo_sapiens_cytochrome_P450_family_2_subfamily_S_polypeptide_1_(CYP2S1)_mRNA	NM_030622	2S1
Homo_sapiens_cytochrome_P450_family_2_subfamily_U_polypeptide_1_(CYP2U1)_mRNA	NM_183075	2U1
Homo_sapiens_cytochrome_P450_family_2_subfamily_W_polypeptide_1_(CYP2W1)_mRNA	NM_017781	2W1
Homo_sapiens_cytochrome_P450_family_3_subfamily_A_polypeptide_4_(CYP3A4)_mRNA_complete_cds	DQ924960	3A4
Homo_sapiens_cytochrome_P450_family_3_subfamily_A_polypeptide_43_(CYP3A43)_transcript_variant_1_mRNA	NM_022820	3A43
Homo_sapiens_cytochrome_P450_family_3_subfamily_A_polypeptide_5_(CYP3A5)_transcript_variant_1_mRNA	NM_000777	3A5
Homo_sapiens_cytochrome_P450_family_3_subfamily_A_polypeptide_7_(CYP3A7)_mRNA	NM_000765	3A7
Build 37.3

## Sheet: chicken
Definition in Genbank	Accession number	Isoform	Ensembl genome browser
Gallus_gallus_cytochrome_P450_1A4_(CYP1A4)_mRNA.	NM_205147	1A4
Gallus_gallus_cytochrome_P450_family_1_subfamily_A_polypeptide_1_(CYP1A1)_mRNA.	NM_205146	1A5
PREDICTED:_Gallus_gallus_cytochrome_P450_family_1_subfamily_B_polypeptide_1_(CYP1B1)_mRNA.	XM_419515	1B1
PREDICTED: Gallus gallus cytochrome P450, family 1, subfamily B, polypeptide 1 (CYP1B1), mRNA	XM_001233594.1	1C1
Gallus_gallus_cytochrome_P450_2H1_(CYP2H1)_mRNA._NM_001001616	NM_001001616.1	2C23a
Gallus_gallus_cytochrome_P450_family_2_subfamily_C_polypeptide_18_(CYP2C18)_mRNA.	NM_001001757	2C23b
Gallus_gallus_cytochrome_P-450_2C45_(CYP2C45)_mRNA.	NM_001001752	2C45
Gallus_gallus_cytochrome_P450_family_2_subfamily_D_polypeptide_6_(CYP2D6)_mRNA.	NM_001195557	2D49
PREDICTED:_Gallus_gallus_cytochrome_P450_2J2-like_(LOC424729)_mRNA.	XM_422553	2J19
PREDICTED:_Gallus_gallus_cytochrome_P450_family_2_subfamily_J_polypeptide_2_(CYP2J2)_mRNA.	XM_422511	2J20	ENSGALT00000017750
Gallus gallus mRNA for hypothetical protein clone 33b23	emb|AJ721037.1	2J21	ENSGAL00000017750
Gallus_gallus_cytochrome_P450_2J2-like_(LOC424677)_mRNA.	XM_422510	2J22
Gallus_gallus_cytochrome_P450_2J2-like_(LOC424676)_mRNA.	XM_422509	2J23
PREDICTED: Gallus gallus cytochrome P450 family 2 subfamily R polypeptide 1 (CYP2R1) mRNA	XM_420996.3	2R1
PREDICTED:_Gallus_gallus_cytochrome_P450_2U1-like_(LOC422528)_mRNA.	XM_420491	2U1
PREDICTED:_Gallus_gallus_cytochrome_P450_family_2_subfamily_W_polypeptide_1_(CYP2W1)_mRNA.	XM_003642141	2W1	ENSGALP00000006227
PREDICTED:_Gallus_gallus_cytochrome_P450_family_2_subfamily_W_polypeptide_1_(CYP2W1)_mRNA.	XM_414762	2W2	ENSGALP00000006436
PREDICTED:_Gallus_gallus_cytochrome_P450_2J2-like_(LOC424944)_mRNA.	XM_422751	2AB1	ENSGALP00000013465
PREDICTED:_Gallus_gallus_cytochrome_P450_2J2-like_(LOC770119)_mRNA.	XM_001233444	2AB2	ENSGALP00000013290
PREDICTED:_Gallus_gallus_cytochrome_P450_2J6-like_(LOC424943)_mRNA.	XM_422750	2AB3	ENSGALP00000013284
PREDICTED:_Gallus_gallus_cytochrome_P450_2J6-like_(LOC429153)_mRNA.	XM_426708	2AB4	ENSGALP00000013145
PREDICTED:_Gallus_gallus_cytochrome_P450_2J6-like_(LOC429152)_mRNA.	XM_426707	2AB5	ENSGALP00000013083
PREDICTED:_Gallus_gallus_cytochrome_P450_2K1-like_(LOC422046)_mRNA.	XM_420052	2AC1
PREDICTED:_Gallus_gallus_cytochrome_P450_family_2_subfamily_B_polypeptide_7_pseudogene_1_(CYP2B7P1)_mRNA.	XM_003641058	2AC2
PREDICTED:_Gallus_gallus_cytochrome_P450_family_2_subfamily_A_polypeptide_13_(CYP2A13)_mRNA.	XM_425230	2AC7	ENSGALP00000006228
Gallus_gallus_cytochrome_P450_A_37_(CYP3A7)_mRNA._NM_001001751	NM_001001751.1	3A37
PREDICTED:_Gallus_gallus_cytochrome_P450_family_3_subfamily_A_polypeptide_4_(CYP3A4)_mRNA.	XM_414782	3A80
Build 3.1

## Sheet: finch
Definition in Genbank	Accession number	Isoform	Ensembl genome browser
gi|224381667:1967311-1973816_Taeniopygia_guttata_chromosome_10_reference_assembly_(based_on_Taeniopygia_guttata-3.2.4)_whole_genome_shotgun_sequence	NC_011474	1A4
PREDICTED:_Taeniopygia_guttata_similar_to_cytochrome_P450_1A5_(LOC100230890)_mRNA.	XM_002195752	1A5
PREDICTED:_Taeniopygia_guttata_similar_to_cytochrome_P450_1B1_(LOC100230258)_mRNA.	XM_002191289	1B1
PREDICTED:_Taeniopygia_guttata_similar_to_cytochrome_P450_2H1_(LOC100224142)_mRNA.	XM_002198192	2C23
PREDICTED:_Taeniopygia_guttata_similar_to_cytochrome_P-450_2C45_(LOC100228872)_mRNA.	XM_002197658	2C45
PREDICTED: Taeniopygia guttata similar to Cytochrome P450 2D14 (LOC100222415), partial mRNA	XM_002192485.1	2D49
PREDICTED:_Taeniopygia_guttata_hypothetical_protein_LOC100224220_(LOC100224220)_mRNA.	XM_002198481	2J40
PREDICTED:_Taeniopygia_guttata_similar_to_cytochrome_P450_2J2_(LOC100230439)_mRNA.	XM_002187970	2J19aP
PREDICTED:_Taeniopygia_guttata_similar_to_cytochrome_P450_2J2_(LOC100217987)_mRNA.	XM_002190498	2J19b
PREDICTED:_Taeniopygia_guttata_similar_to_cytochrome_P450_2J2_(LOC100224206)_mRNA.	XM_002194707	2J19cP
PREDICTED:_Taeniopygia_guttata_similar_to_cytochrome_P450_family_2_subfamily_R_polypeptide_1_(LOC100229624)_mRNA.	XM_002197639	2R1
PREDICTED:_Taeniopygia_guttata_hypothetical_protein_LOC100229295_(LOC100229295)_mRNA.	XM_002194701	2U1
PREDICTED:_Taeniopygia_guttata_similar_to_cytochrome_P450_family_2_subfamily_W_polypeptide_1_(LOC100224214)_mRNA.	XM_002191305	2W1
		2AB1	ENSTGUP00000010335
PREDICTED:_Taeniopygia_guttata_hypothetical_protein_LOC100218227_(LOC100218227)_mRNA.	XM_002191599	2AB2
PREDICTED:_Taeniopygia_guttata_hypothetical_protein_LOC100221075_(LOC100221075)_mRNA.	XM_002191565	2AB3
PREDICTED:_Taeniopygia_guttata_hypothetical_protein_LOC100224002_(LOC100224002)_mRNA.	XM_002191540	2AB4
PREDICTED:_Taeniopygia_guttata_hypothetical_protein_LOC100226896_(LOC100226896)_mRNA.	XM_002191509	2AB5
PREDICTED:_Taeniopygia_guttata_hypothetical_protein_LOC100224630_(LOC100224630)_mRNA.	XM_002189914	2AC2
PREDICTED:_Taeniopygia_guttata_hypothetical_protein_LOC100221290_(LOC100221290)_mRNA.	XM_002191338	2AC7
PREDICTED:_Taeniopygia_guttata_similar_to_cytochrome_P450_family_2_subfamily_C_polypeptide_8_(LOC100219254)_mRNA._	XM_002195283	2AF1	ENSTGUG00000005088
PREDICTED:_Taeniopygia_guttata_similar_to_cytochrome_P450_A_37_(LOC100226034)_mRNA.	XM_002190672	3A37
PREDICTED:_Taeniopygia_guttata_similar_to_cytochrome_P450_3A80_(LOC100223162)_mRNA.	XM_002190700	3A80
Build 1.1

## Sheet: turkey
Definition in Genbank	Accession number	Isoform	Ensembl genome browser
PREDICTED:_Meleagris_gallopavo_cytochrome_P450_1A4-like_(LOC100542486)_mRNA.	XM_003209325	1A4
PREDICTED:_Meleagris_gallopavo_cytochrome_P450_family_1_subfamily_A_polypeptide_5_(CYP1A5)_mRNA.	XM_003209324	1A5
PREDICTED:_Meleagris_gallopavo_cytochrome_P450_1B1-like_(LOC100542888)_mRNA.	XM_003203963	1B1
PREDICTED:_Meleagris_gallopavo_cytochrome_P450_2H2-like_(LOC100545683)_mRNA.	XM_003207992	2C23
PREDICTED:_Meleagris_gallopavo_cytochrome_P450_2C29-like_(LOC100544448)_mRNA.	XM_003207984	2C45
PREDICTED:_Meleagris_gallopavo_cytochrome_P450_2D3-like_(LOC100548322)_mRNA.	XM_003202322	2D49
PREDICTED:_Meleagris_gallopavo_cytochrome_P450_2J2-like_transcript_variant_1_(LOC100547794)_mRNA.	XM_003208883	2J20v1
PREDICTED:_Meleagris_gallopavo_cytochrome_P450_2J2-like_transcript_variant_2_(LOC100547794)_mRNA.	XM_003208884	2J20v2
PREDICTED:_Meleagris_gallopavo_cytochrome_P450_2J2-like_(LOC100549121)_mRNA.	XM_003208892	2J19
PREDICTED:_Meleagris_gallopavo_vitamin_D_25-hydroxylase-like_(LOC100547524)_mRNA.	XM_003206243	2R1
PREDICTED:_Meleagris_gallopavo_cytochrome_P450_2U1-like_(LOC100543147)_mRNA.	XM_003205492	2U1
PREDICTED:_Meleagris_gallopavo_cytochrome_P450_2W1-like_(LOC100546874)_mRNA.	XM_003210555	2W1
PREDICTED:_Meleagris_gallopavo_cytochrome_P450_2W1-like_(LOC100547030)_mRNA.	XM_003210556	2W2
PREDICTED:_Meleagris_gallopavo_cytochrome_P450_2J2-like_(LOC100541927)_mRNA.	XM_003209165	2AB1
PREDICTED:_Meleagris_gallopavo_cytochrome_P450_2J2-like_(LOC100541770)_mRNA.	XM_003209164	2AB2
		2AB3	ENSMGAT00000009610
PREDICTED:_Meleagris_gallopavo_cytochrome_P450_2J6-like_(LOC100541617)_mRNA.	XM_003209163	2AB4	ENSMGAT00000009605
PREDICTED:_Meleagris_gallopavo_cytochrome_P450_2J2-like_(LOC100541465)_mRNA.	XM_003209162	2AB5	ENSMGAT00000020369
PREDICTED:_Meleagris_gallopavo_cytochrome_P450_2K1-like_(LOC100548279)_mRNA.	XM_003204643	2AC1
PREDICTED:_Meleagris_gallopavo_cytochrome_P450_2K1-like_(LOC100548433)_mRNA.	XM_003204644	2AC2
PREDICTED:_Meleagris_gallopavo_cytochrome_P450_2K1-like_(LOC100546724)_mRNA.	XM_003210554	2AC7
PREDICTED:_Meleagris_gallopavo_cytochrome_P450_3A37_(CYP3A37)_mRNA.	XM_003210582	3A37
PREDICTED:_Meleagris_gallopavo_cytochrome_P450_3A80_(CYP3A80)_mRNA.	XM_003210584	3A80
Build 1.1
